# Supplementary material
Source: PubMed Central journal article supplement (PMC4533245)
Supplement: peds.2014-1774_peds.2014-1774SupplementaryData.pdf [file peds.2014-1774_peds.2014-1774SupplementaryData.pdf]

# Supplemental Information

**SUPPLEMENTAL TABLE 3** Race/Ethnicity Disparities in Diabetes Management and Clinical Outcomes Overall and Stratified According to Highest Parental Education Level

| Characteristic                                                  | Non-Hispanic White | Non-Hispanic Black | Hispanic        | P: Values White Versus Black/White Versus Hispanic/Black Versus Hispanic |
|-----------------------------------------------------------------|--------------------|--------------------|-----------------|--------------------------------------------------------------------------|
| Overall                                                         | <i>n</i> = 8841    | <i>n</i> = 697     | <i>n</i> = 1166 |                                                                          |
| Insulin pump use <sup>a</sup>                                   | 5389 (61)          | 181 (26)           | 454 (39)        | <.001/<.001/<.001                                                        |
| SMBG <sup>b</sup>                                               | 6.1 ± 2.4          | 5.4 ± 2.3          | 5.6 ± 2.3       | <.001/<.001/.59                                                          |
| HbA1c <sup>c</sup>                                              | 8.4 ± 1.4          | 9.6 ± 1.9          | 8.7 ± 1.6       | <.001/.04/<.001                                                          |
| ≥1 SH event in past 12 mo <sup>d</sup>                          | 328 (5)            | 70 (13)            | 49 (6)          | <.001/.62/<.001                                                          |
| ≥1 DKA event in past 12 mo <sup>e</sup>                         | 641 (7)            | 153 (23)           | 137 (12)        | <.001/.04/<.001                                                          |
| Highest parental education level: less than high school diploma | <i>n</i> = 2378    | <i>n</i> = 321     | <i>n</i> = 599  |                                                                          |
| Insulin pump use <sup>a</sup>                                   | 1103 (46)          | 67 (21)            | 175 (29)        | <.001/<.001/.09                                                          |
| SMBG <sup>b</sup>                                               | 5.8 ± 2.3          | 5.1 ± 2.1          | 5.3 ± 2.1       | <.001/<.001/.70                                                          |
| HbA1c <sup>c</sup>                                              | 8.8 ± 1.6          | 9.8 ± 1.8          | 8.8 ± 1.6       | <.001/.81/<.001                                                          |
| ≥1 SH event in past 12 mo <sup>d</sup>                          | 109 (6)            | 38 (14)            | 27 (6)          | <.001/.64/<.001                                                          |
| ≥1 DKA event in past 12 mo <sup>e</sup>                         | 289 (12)           | 80 (25)            | 93 (16)         | <.001/.14/.007                                                           |
| Highest parental education: associate or bachelor degree        | <i>n</i> = 3602    | <i>n</i> = 216     | <i>n</i> = 298  |                                                                          |
| Insulin pump use <sup>a</sup>                                   | 2311 (64)          | 65 (30)            | 165 (57)        | <.001/.12/<.001                                                          |
| SMBG <sup>b</sup>                                               | 6.2 ± 2.3          | 5.5 ± 2.3          | 6.0 ± 2.3       | .06/.02/.91                                                              |
| HbA1c <sup>c</sup>                                              | 8.3 ± 1.3          | 9.6 ± 2.0          | 8.4 ± 1.4       | <.001/.12/<.001                                                          |
| ≥1 SH event in past 12 mo <sup>d</sup>                          | 110 (4)            | 23 (13)            | 14 (6)          | <.001/.09/.04                                                            |
| ≥1 DKA event in past 12 mo <sup>e</sup>                         | 240 (7)            | 50 (23)            | 23 (8)          | <.001/.72/<.001                                                          |
| Highest parental education level: graduate degree               | <i>n</i> = 2339    | <i>n</i> = 72      | <i>n</i> = 135  |                                                                          |
| Insulin pump use <sup>a</sup>                                   | 1701 (73)          | 34 (47)            | 86 (64)         | <.001/.04/.01                                                            |
| SMBG <sup>b</sup>                                               | 6.5 ± 2.5          | 5.9 ± 2.3          | 6.5 ± 2.5       | .27/.55/.59                                                              |
| HbA1c <sup>c</sup>                                              | 8.1 ± 1.2          | 8.9 ± 1.7          | 8.1 ± 1.4       | <.001/.04/.001                                                           |
| ≥1 SH event in past 12 mo <sup>d</sup>                          | 91 (5)             | 4 (8)              | 3 (3)           | .55/.40/.29                                                              |
| ≥1 DKA event in past 12 mo <sup>e</sup>                         | 79 (3)             | 9 (13)             | 8 (6)           | <.001/.11/.14                                                            |
| Highest parental education level: not provided                  | <i>n</i> = 522     | <i>n</i> = 88      | <i>n</i> = 134  |                                                                          |
| Insulin pump use <sup>a</sup>                                   | 274 (53)           | 15 (17)            | 28 (21)         | <.001/<.001/.91                                                          |
| SMBG <sup>b</sup>                                               | 5.8 ± 2.5          | 5.5 ± 3.5          | 4.9 ± 2.6       | .88/.02/.13                                                              |
| HbA1c <sup>c</sup>                                              | 8.6 ± 1.5          | 9.8 ± 1.9          | 9.0 ± 1.8       | <.001/.13/.12                                                            |
| ≥1 SH event in past 12 mo <sup>d</sup>                          | 18 (7)             | 5 (14)             | 5 (6)           | .20/.89/.33                                                              |
| ≥1 DKA event in past 12 mo <sup>e</sup>                         | 33 (10)            | 14 (27)            | 13 (14)         | .03/.81/.09                                                              |

Data are presented as *n* (%) or mean ± SD.

<sup>a</sup> A total of 44 participants were using both an insulin pump and injections and were not included in the analysis. Binary mixed models were adjusted for age, diabetes duration, interaction between age and diabetes duration, gender, highest parental education level (missing data imputed for ordinal variable and missing indicator included in model), annual household income (missing data imputed for ordinal variable and missing indicator included in model; not included in stratified models), and random site effect.

<sup>b</sup> A total of 394 participants were missing self-reported SMBG per day data (8552 white, 652 black, and 1106 Hispanic subjects). Linear mixed models were adjusted for age, insulin method, continuous glucose monitoring use, gender, highest parental education level (missing data imputed for ordinal variable and missing indicator included in model), annual household income (missing data imputed for ordinal variable and missing indicator included in model; not included in stratified models), and random site effect.

<sup>c</sup> Linear mixed models were adjusted for age, insulin method, continuous glucose monitoring use, SMBG per day, highest parental education level (missing data imputed for ordinal variable and missing indicator included in model), annual household income (missing data imputed for ordinal variable and missing indicator included in model; not included in stratified models), and random site effect.

<sup>d</sup> A total of 4298 participants were missing SH data due to a change in how an SH event was defined during the enrollment period (6406 white, 525 black, and 1120 Hispanic subjects). Binary mixed models were adjusted for age, diabetes duration, gender, insulin method, SMBG per day, highest parental education level (missing data imputed for ordinal variable and missing indicator included in model), annual household income (missing data imputed for ordinal variable and missing indicator included in model; not included in stratified models), and random site effect.

<sup>e</sup> A total of 307 participants were missing DKA event data (8618 white, 659 black, and 1120 Hispanic subjects). Binary mixed models were adjusted for age, diabetes duration, gender, insulin method, SMBG per day, highest parental education level (missing data imputed for ordinal variable and missing indicator included in model), annual household income (missing data imputed for ordinal variable and missing indicator included in model; not included in stratified models), and random site effect.

**SUPPLEMENTAL TABLE 4** Race/Ethnicity Disparities in Insulin Pump Use According to Demographic Characteristics

| Characteristic                   | Race/Ethnicity     |                        |                    |                        |                    |                        |
|----------------------------------|--------------------|------------------------|--------------------|------------------------|--------------------|------------------------|
|                                  | Non-Hispanic White |                        | Non-Hispanic Black |                        | Hispanic or Latino |                        |
|                                  | <i>N</i>           | Pump Use, <i>N</i> (%) | <i>N</i>           | Pump Use, <i>N</i> (%) | <i>N</i>           | Pump Use, <i>N</i> (%) |
| All                              | 8807               | 5389 (61)              | 696                | 181 (26)               | 1157               | 454 (39)               |
| Age group, y                     |                    |                        |                    |                        |                    |                        |
| <6                               | 529                | 278 (53)               | 35                 | 12 (34)                | 53                 | 16 (30)                |
| 6–<13                            | 4040               | 2560 (63)              | 329                | 86 (26)                | 535                | 223 (42)               |
| 13–<18                           | 4238               | 2551 (60)              | 332                | 83 (25)                | 569                | 215 (38)               |
| Gender                           |                    |                        |                    |                        |                    |                        |
| Female                           | 4192               | 2636 (63)              | 374                | 102 (27)               | 594                | 244 (41)               |
| Male                             | 4615               | 2753 (60)              | 322                | 79 (25)                | 563                | 210 (37)               |
| T1D duration group, y            |                    |                        |                    |                        |                    |                        |
| 1–2                              | 2445               | 1190 (49)              | 209                | 46 (22)                | 334                | 101 (30)               |
| 3–5                              | 2790               | 1735 (62)              | 236                | 69 (29)                | 403                | 164 (41)               |
| 6–9                              | 2309               | 1593 (69)              | 172                | 37 (22)                | 293                | 130 (44)               |
| ≥10                              | 1263               | 871 (69)               | 79                 | 29 (37)                | 127                | 59 (46)                |
| Highest parental education level |                    |                        |                    |                        |                    |                        |
| Less than high school diploma    | 2373               | 1103 (46)              | 321                | 67 (21)                | 596                | 175 (29)               |
| Associate or bachelor degree     | 3585               | 2311 (64)              | 215                | 65 (30)                | 292                | 165 (57)               |
| Graduate degree                  | 2330               | 1701 (73)              | 72                 | 34 (47)                | 135                | 86 (64)                |
| Missing                          | 519                | 274 (53)               | 88                 | 15 (17)                | 134                | 28 (21)                |
| Household income, \$             |                    |                        |                    |                        |                    |                        |
| <50 000                          | 1575               | 702 (45)               | 286                | 65 (23)                | 417                | 120 (29)               |
| 50 000–<100 000                  | 2464               | 1549 (63)              | 101                | 36 (36)                | 195                | 102 (52)               |
| ≥100 000                         | 2488               | 1815 (73)              | 58                 | 26 (45)                | 155                | 103 (66)               |
| Missing                          | 2280               | 1323 (58)              | 251                | 54 (22)                | 390                | 129 (33)               |
| Insurance                        |                    |                        |                    |                        |                    |                        |
| Private insurance                | 6369               | 4218 (66)              | 232                | 83 (36)                | 481                | 265 (55)               |
| Other insurance                  | 1637               | 762 (47)               | 356                | 75 (21)                | 455                | 128 (28)               |
| No insurance                     | 35                 | 12 (34)                | 4                  | 1 (25)                 | 15                 | 2 (13)                 |
| Missing                          | 766                | 397 (52)               | 104                | 22 (21)                | 206                | 59 (29)                |

**SUPPLEMENTAL TABLE 5** Mean HbA1c and Blood Glucose From Meter Download According to Race/Ethnicity Among Participants with an Available Home Glucose Meter Download at Enrollment

| Characteristic                  | Race/Ethnicity     |            |                    |            |                    |            |
|---------------------------------|--------------------|------------|--------------------|------------|--------------------|------------|
|                                 | Non-Hispanic White |            | Non-Hispanic Black |            | Hispanic or Latino |            |
|                                 | <i>N</i>           | Mean ± SD  | <i>N</i>           | Mean ± SD  | <i>N</i>           | Mean ± SD  |
| HbA1c, %                        | 4640               | 8.3 ± 1.3  | 300                | 9.5 ± 1.8  | 755                | 8.5 ± 1.4  |
| Mean glucose, mg/dL             | 4640               | 208 ± 52.6 | 300                | 234 ± 67.4 | 755                | 213 ± 53.4 |
| Meter glucose by HbA1c group, % |                    |            |                    |            |                    |            |
| <6.5                            | 142                | 143 ± 31   | 4                  | 162 ± 36   | 24                 | 163 ± 60   |
| 6.5–<7.5                        | 960                | 171 ± 30   | 25                 | 179 ± 46   | 151                | 174 ± 27   |
| 7.5–<8.5                        | 1721               | 199 ± 34   | 63                 | 189 ± 39   | 261                | 198 ± 32   |
| 8.5–<9.5                        | 1063               | 225 ± 40   | 61                 | 234 ± 40   | 173                | 233 ± 39   |
| 9.5–<10.5                       | 449                | 253 ± 52   | 63                 | 242 ± 57   | 72                 | 254 ± 61   |
| ≥10.5                           | 305                | 287 ± 76   | 84                 | 282 ± 77   | 74                 | 278 ± 65   |

A meter download from the most recent clinic visit was available in 52%, 43%, and 65% of white, black, and Hispanic participants, respectively.
